# Supplementary material
Source: publisher figshare collection journal article supplement (https://tandf.figshare.com/ndownloader/files/15102914)
Supplement: Supplementary file 1 [file 15102914]

**Supplementary information**

**Modeling the effect of blood vessel bifurcation ratio on occlusive thrombus formation**

Hari Hara Sudhan Lakshmanan,a, b* Joseph J. Shatzel,a, c Sven R. Olson,c Owen J.T. McCarty,a,c Jeevan Maddalaa, b*

*aBiomedical Engineering, School of Medicine, Oregon Health & Science University, Portland, OR, USA; bChemical and Biomedical Engineering, West Virginia University, Morgantown, WV, USA; cDivision of Hematology-Oncology, School of Medicine, Oregon Health & Science University, Portland, OR, USA;*

**Mathematical derivation for shear rate on thrombus surface**

Equation for shear rate on thrombus surface for a fully developed steady Newtonian flow reads as

|  |  |
| --- | --- |

Substituting the above in equation

|  |  |
| --- | --- |

Substituting these in, we get

|  |  |
| --- | --- |
|  |  |

This could be further simplified as the first few terms in could be grouped as the inlet shear rate in the parent vessel.

| So equation is simplified to, |  |
| --- | --- |
|  |  |
|  |  |

|  |  |
| --- | --- |

The variables used for resistances, diameters and lengths in these equations are depicted in Figures 3(a), (b) and (c).

Simplifying we obtain as

|  |  |
| --- | --- |

Similarly can be written as

|  |  |
| --- | --- |

For equation we need

|  |  |
| --- | --- |

Substituting in, we get equation (9) (in the manuscript) to describe the shear rate on the thrombus surface at different stages of occlusion.

|  |  |
| --- | --- |

This model describes the instantaneous shear rate on thrombus surface at any stage of occlusion defined by occlusion ratio.
